# Supplementary material for: Metagenomics reveals functional synergy and novel polysaccharide utilization loci in the Castor canadensis fecal microbiome
Source: PubMed Central journal article supplement (PMC6193987; doi:10.1038/s41396-018-0215-9), 2018-07-16

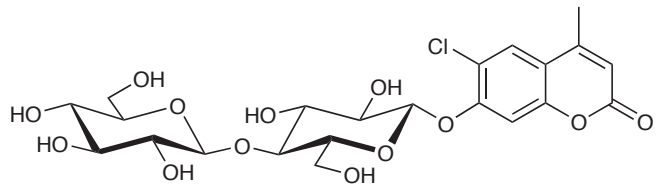

6-chloro-4-methylumbelliferyl cellobioside

+

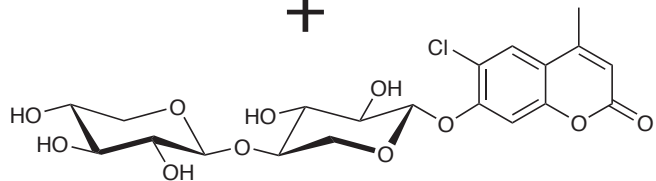

6-chloro-4-methylumbelliferyl xylobioside

+

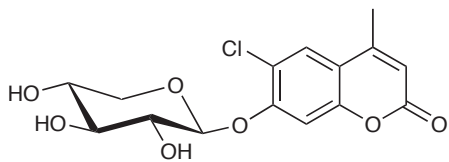

6-chloro-4-methylumbelliferyl xyloside

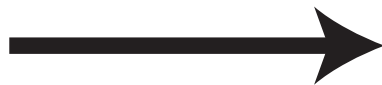

[ Cellulase  
or Xylanase  
or Xylosidase ]

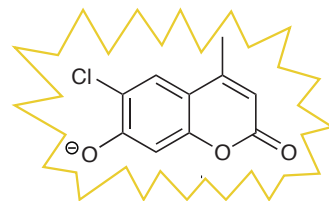

6-chloro-4-methylumbelliferone

+

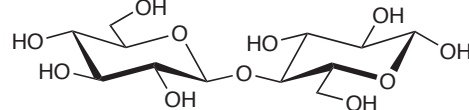

or

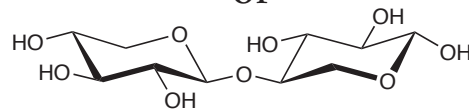

or

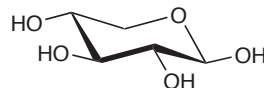

Supplement: 41396_2018_215_MOESM3_ESM.pdf [file 41396_2018_215_MOESM3_ESM.pdf]
