# Supplementary material for: Metagenomics reveals functional synergy and novel polysaccharide utilization loci in the Castor canadensis fecal microbiome
Source: PubMed Central journal article supplement (PMC6193987; doi:10.1038/s41396-018-0215-9), 2018-07-16
Supplement: 41396_2018_215_MOESM5_ESM.pdf [file 41396_2018_215_MOESM5_ESM.pdf]

Optimal Substrates

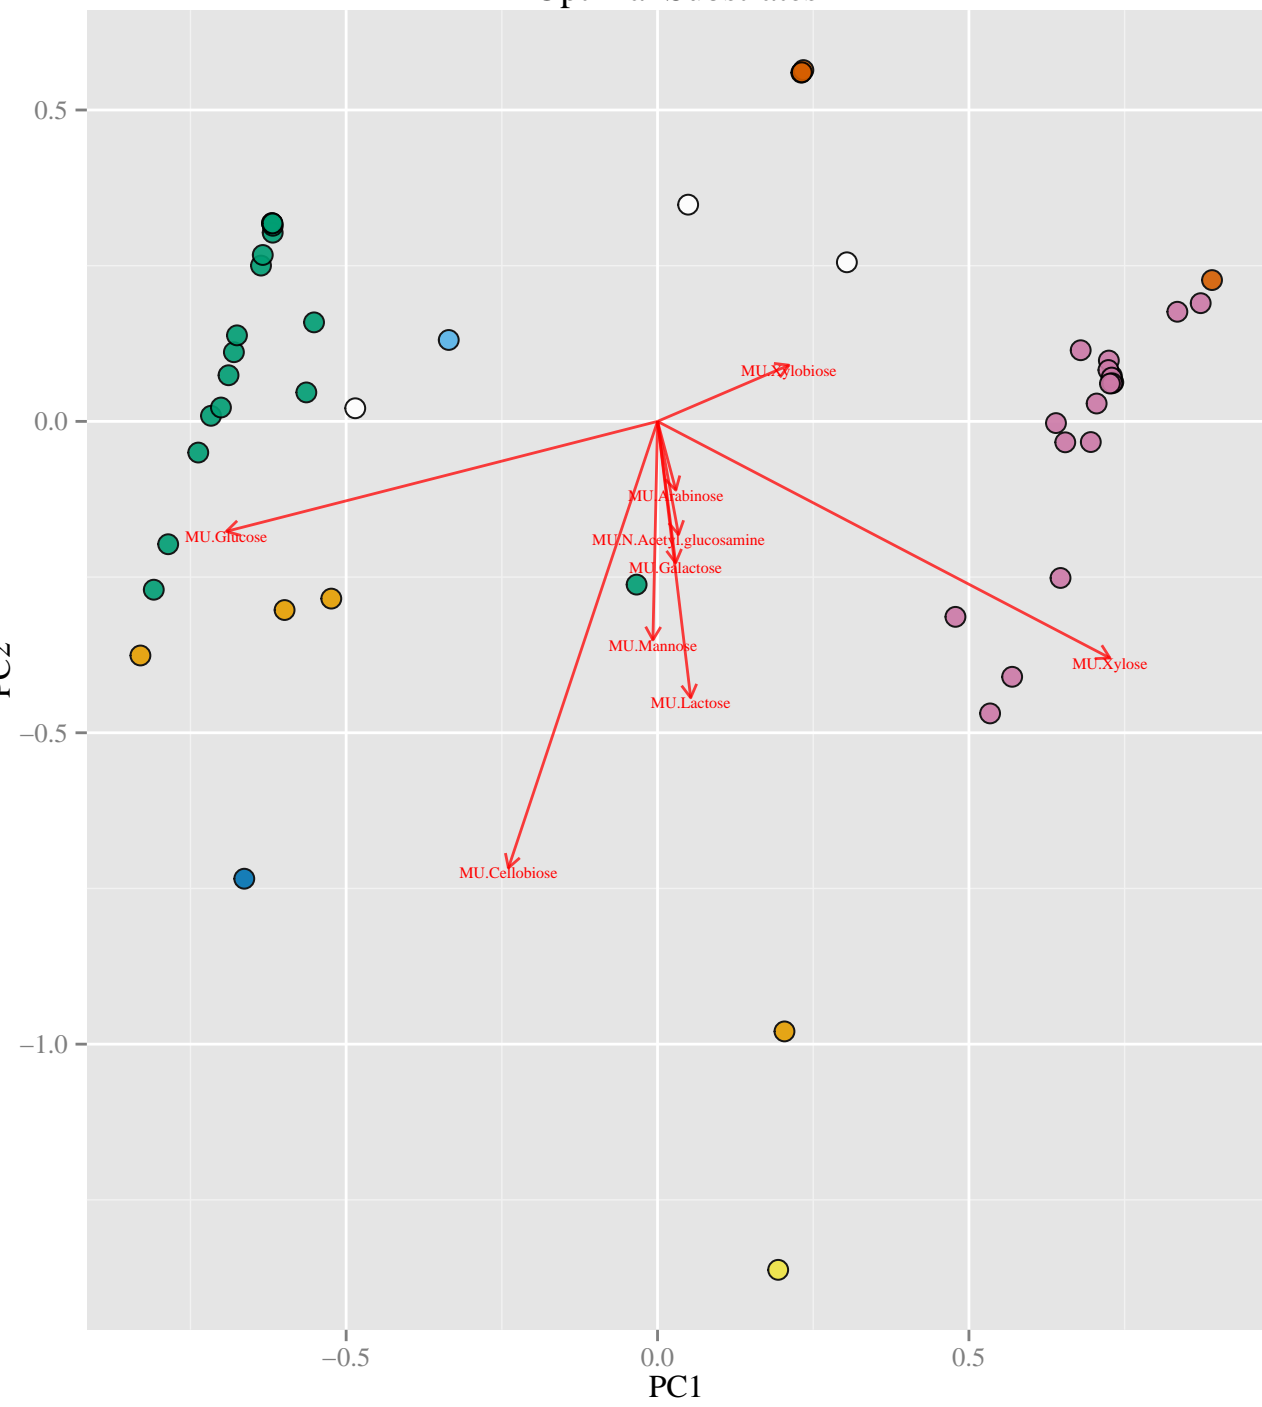

GH3 Genes

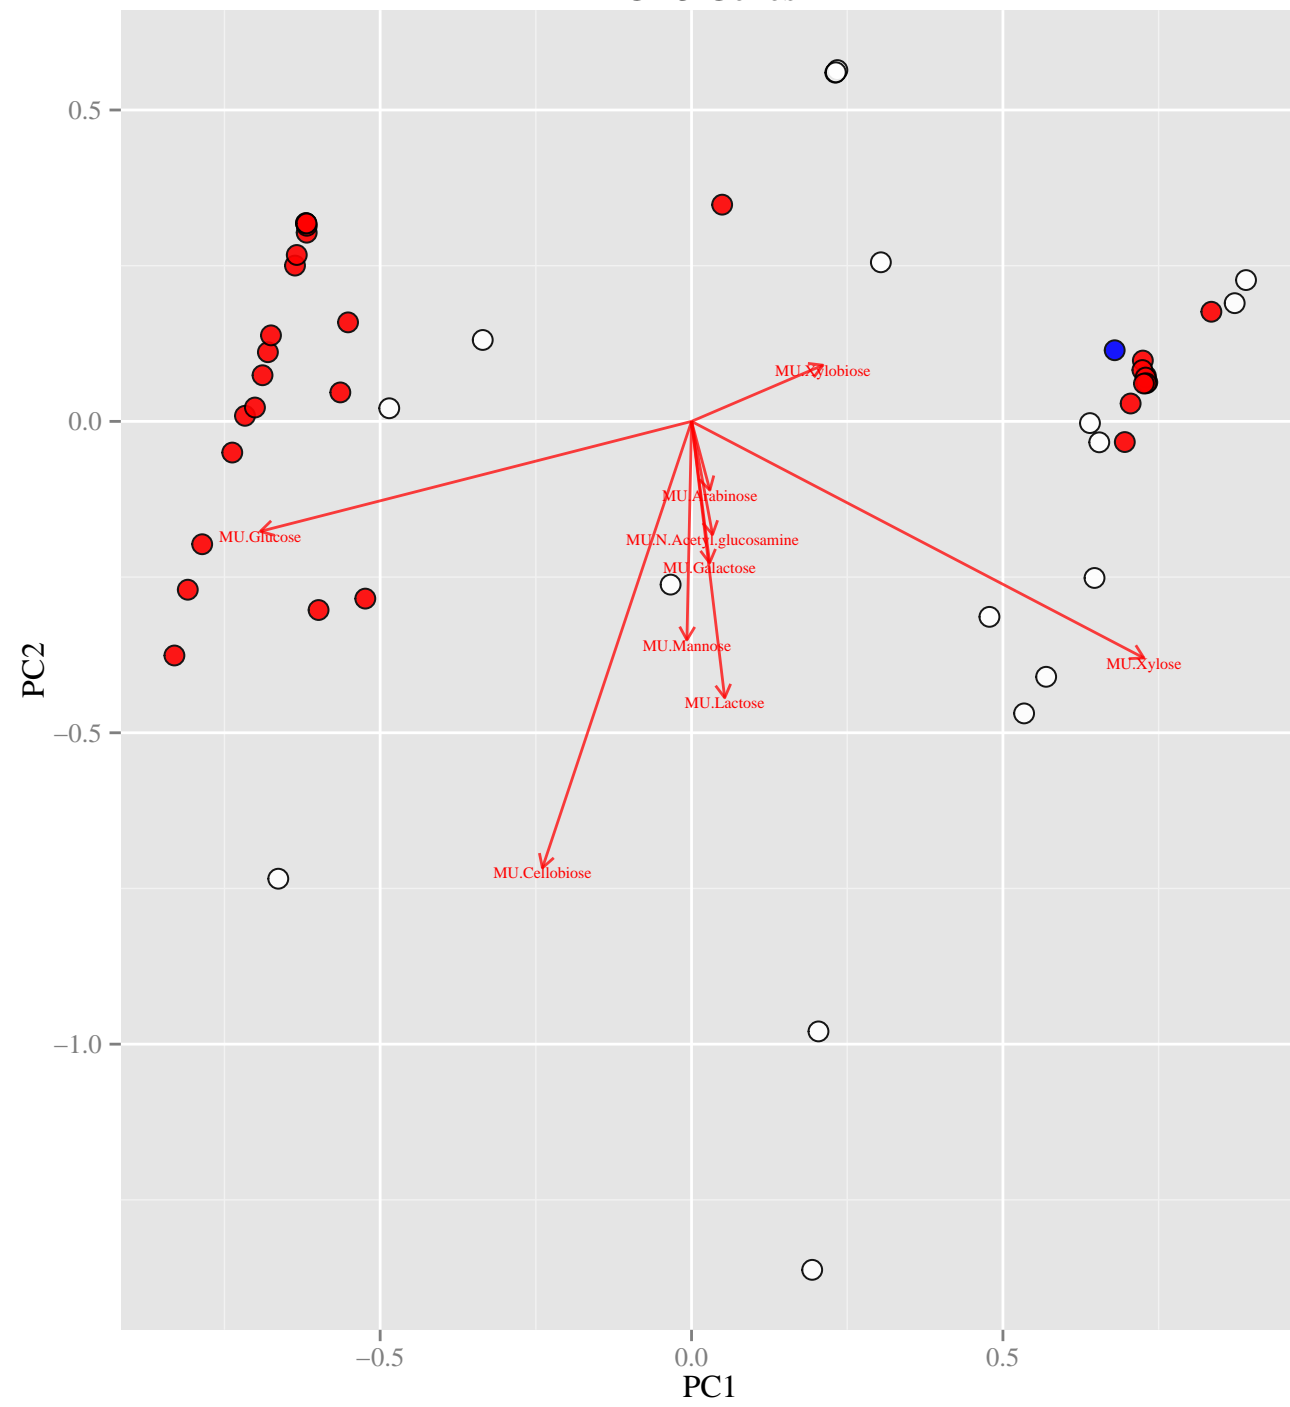

GH43 Genes

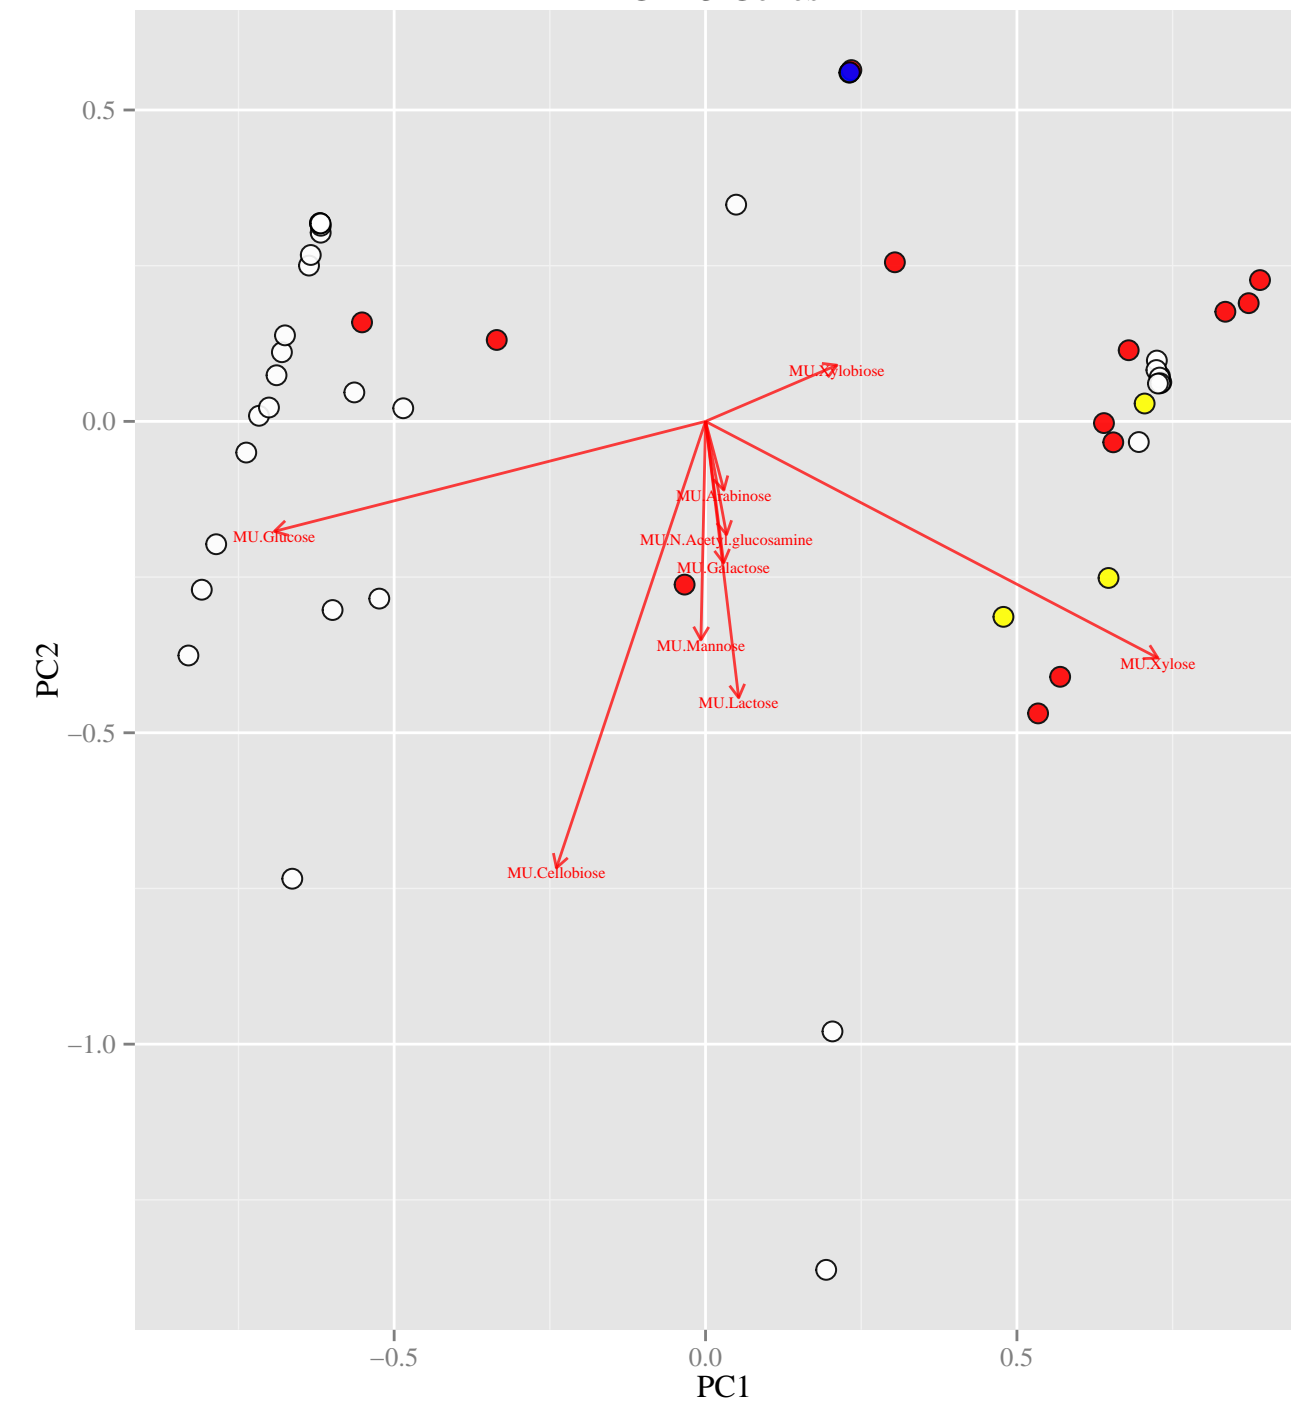

○ Arabinose ● Cellobiose ● Galactose ● Glucose ● Lactose ● Mannose ● Xylobiose ● Xylose

○ 0 ● 1 ● 2

○ 0 ● 1 ● 2 ● 3
